# Supplementary material for: Electrochemically activated copper-based catalyst from a coordination polymer for stable hydrogen evolution reaction
Source: Royal Society of Chemistry journal article supplement (doi:10.1039/d5ta00506j), 2025-01-01
Supplement: d5ta00506j1.pdf [file d5ta00506j1.pdf]

## Supplementary information

### Electrochemically activated copper-based catalyst from coordination polymer for stable hydrogen evolution reaction

Taehun Im,<sup>a,c</sup> Joo-Won Lee,<sup>a,b</sup> Sung-Chul Kim,<sup>c</sup> Sungju Jun,<sup>a,c</sup> Jae-Seung Lee,<sup>c</sup> Min-Seok Kim,<sup>b</sup> Jae Kyun Lee<sup>d</sup> and Sohee Jeong<sup>\*a</sup>

<sup>a</sup>Materials Architecturing Research Center, Korea Institute of Science and Technology, 5, Hwarang-ro 14 gil, Seongbuk-gu, Seoul, 02792, Republic of Korea.

E-mail: soheejeong@kist.re.kr

<sup>b</sup>Extreme Materials Research Center, Korea Institute of Science and Technology, 5, Hwarang-ro 14 gil, Seongbuk-gu, Seoul, 02792, Republic of Korea

<sup>c</sup>Advanced Analysis and Data Center, Korea Institute of Science and Technology, 5, Hwarang-ro 14 gil, Seongbuk-gu, Seoul, 02792, Republic of Korea

<sup>d</sup>Brain Science Institute, Korea Institute of Science and Technology, 5, Hwarang-ro 14 gil, Seongbuk-gu, Seoul, 02792, Republic of Korea

<sup>e</sup>Department of Materials Science and Engineering, Korea University, 145, Anam-ro, Seongbuk-gu, Seoul, 02841, Republic of Korea

## Supplementary Figures

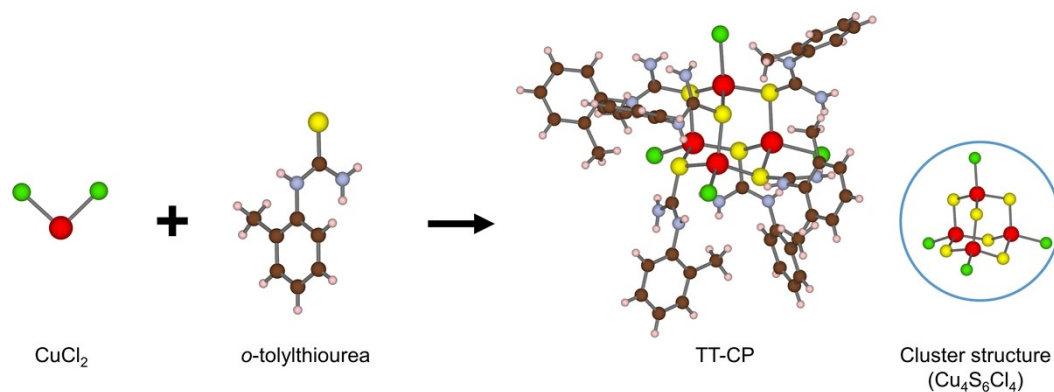

**Fig. S1** Schematic illustration showing the fabrication process of TT-CP by mixing  $\text{CuCl}_2$  and *o*-tolylthiourea.

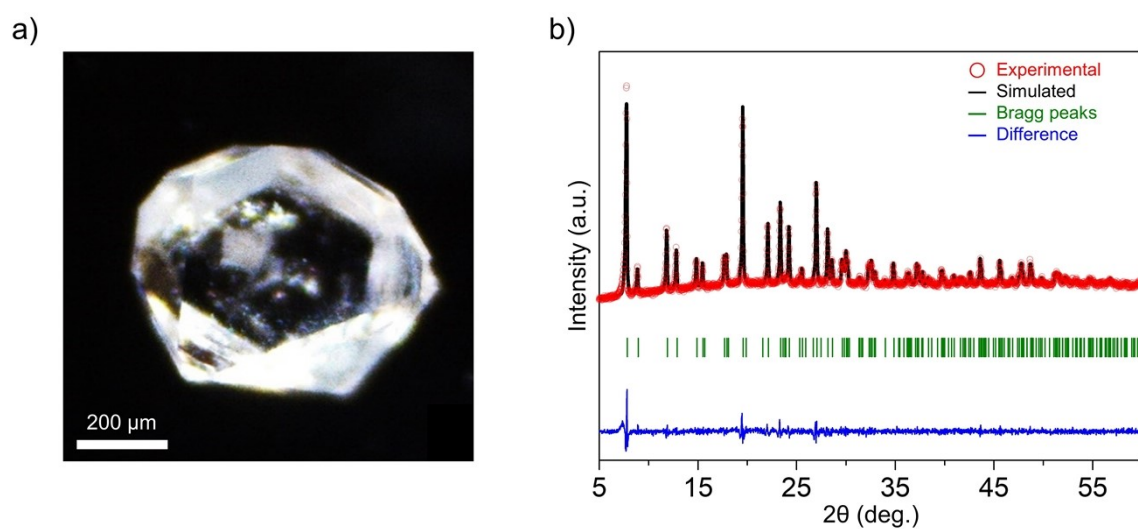

**Fig. S2** (a) Optical microscope image of a TT-CP single crystal. (b) Rietveld refinement result of micrometer-scale TT-CP powders.

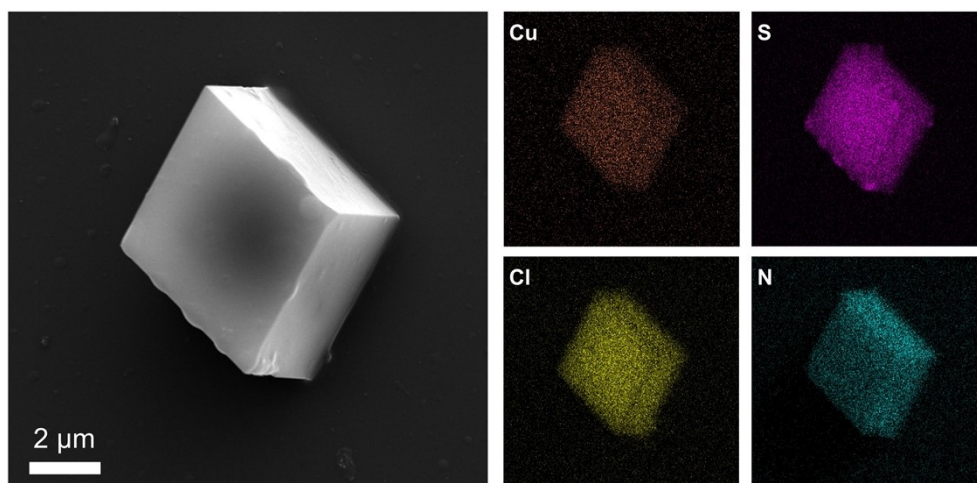

**Fig. S3** SEM image and EDS mapping result of a single TT-CP micrometer-scale powder, where the Cu, S, Cl, C, and S elements are detected.

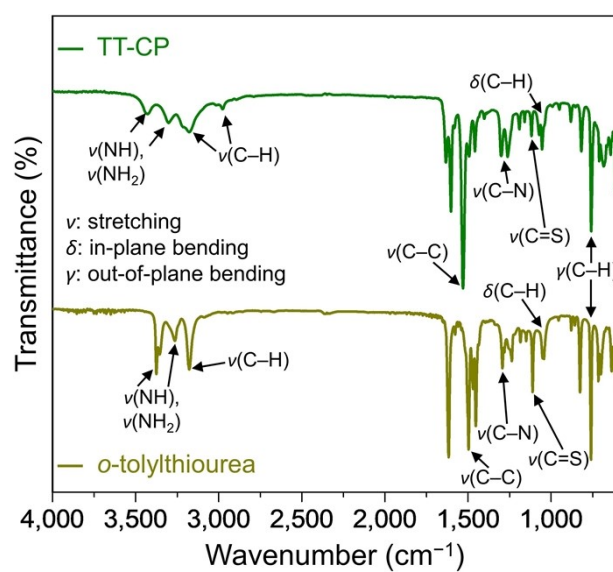

**Fig. S4** FT-IR spectra of *o*-tolylthiourea and TT-CP.

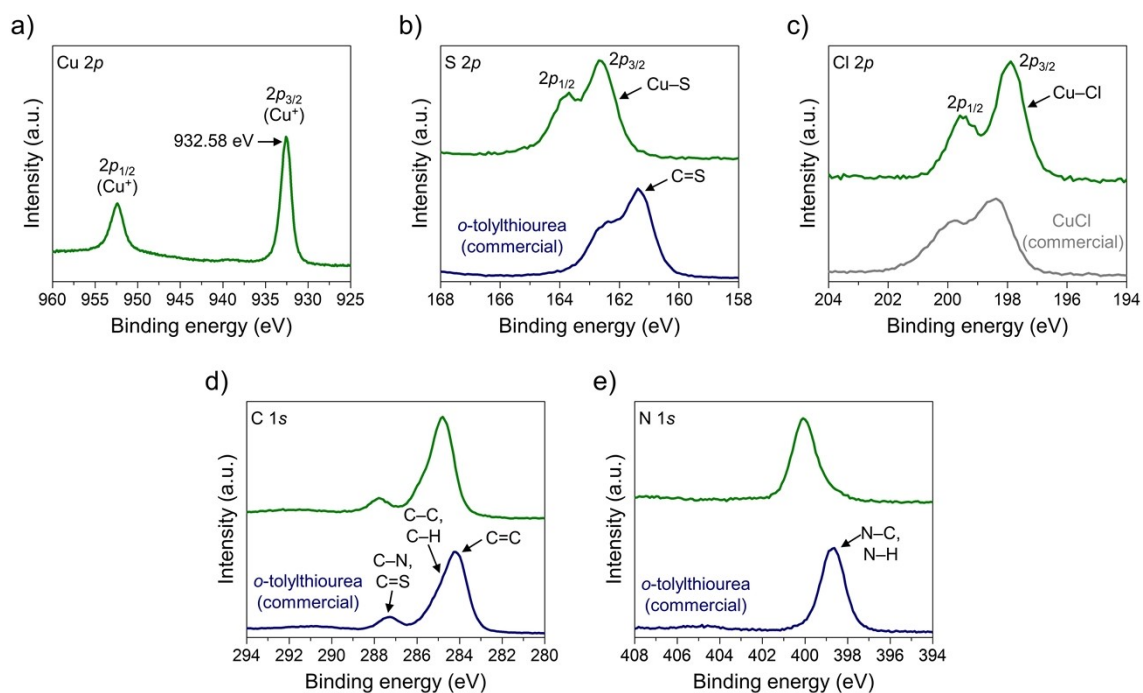

**Fig. S5** XPS spectra of TT-CP measured at the core level region of (a) Cu  $2p$ , (b) S  $2p$ , (c) Cl  $2p$ , (d) C  $1s$ , and (e) N  $1s$ .

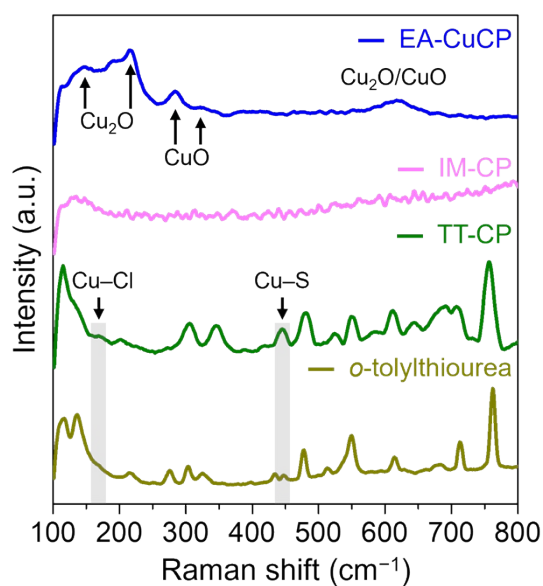

**Fig. S6** Raman spectra of *o*-tolythiourea, TT-CP, IM-Cu, and EA-CuCP.

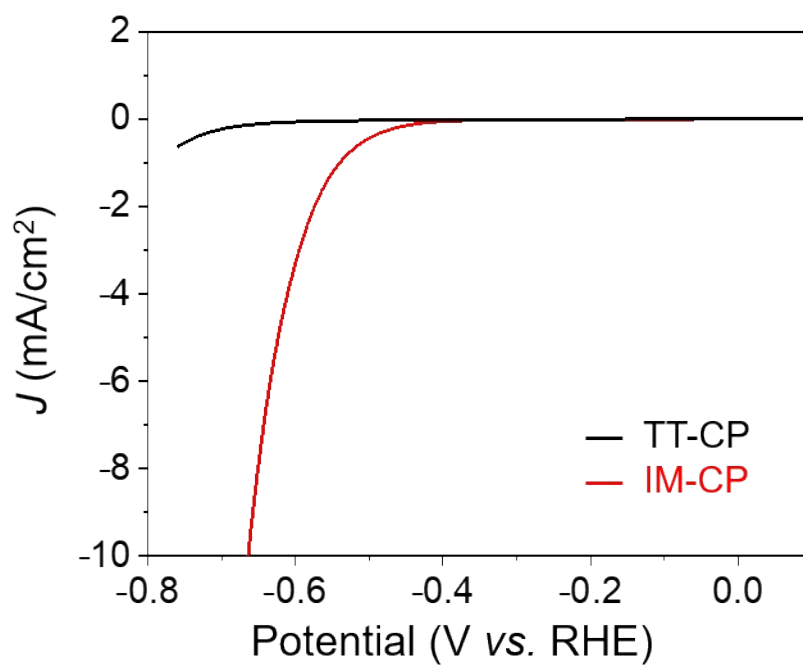

**Fig. S7** HER polarization curves of TT-CP and IM-CP

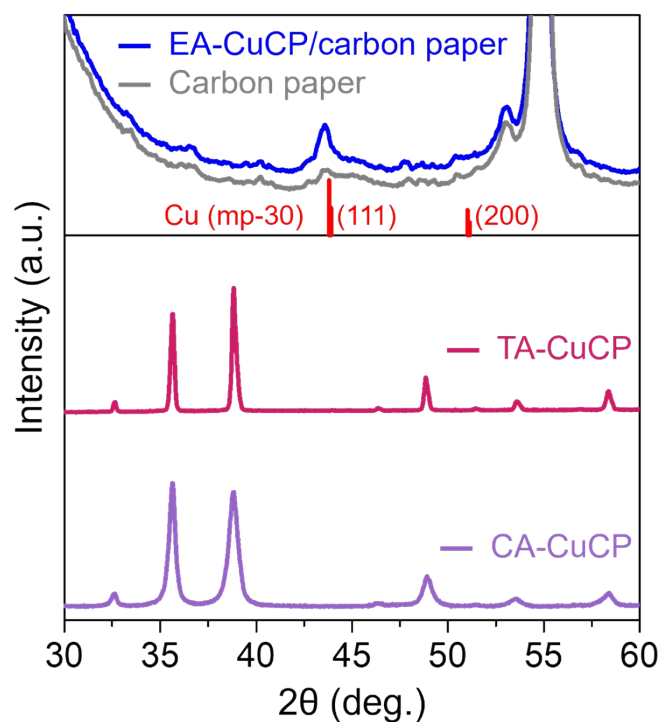

**Fig. S8** PXRd patterns of CA-CuCP, TA-CuCP, and EA-CuCP/carbon paper. Inset red vertical lines present reference diffraction patterns of Cu (mp-30), as obtained from the Materials Project.

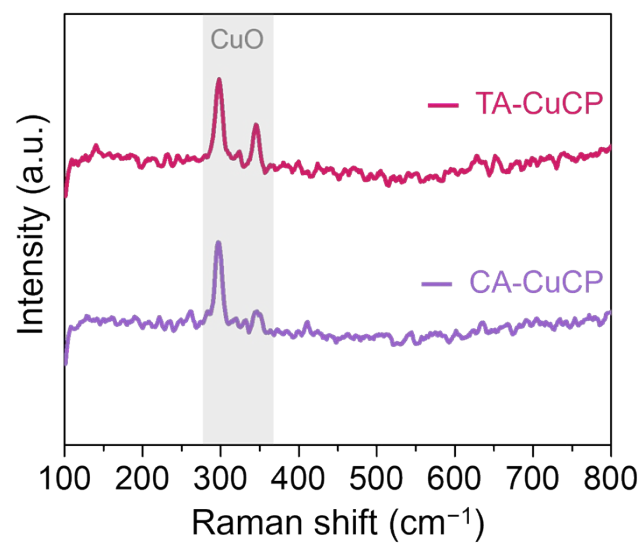

**Fig. S9** Raman spectra of CA-CuCP and TA-CuCP.

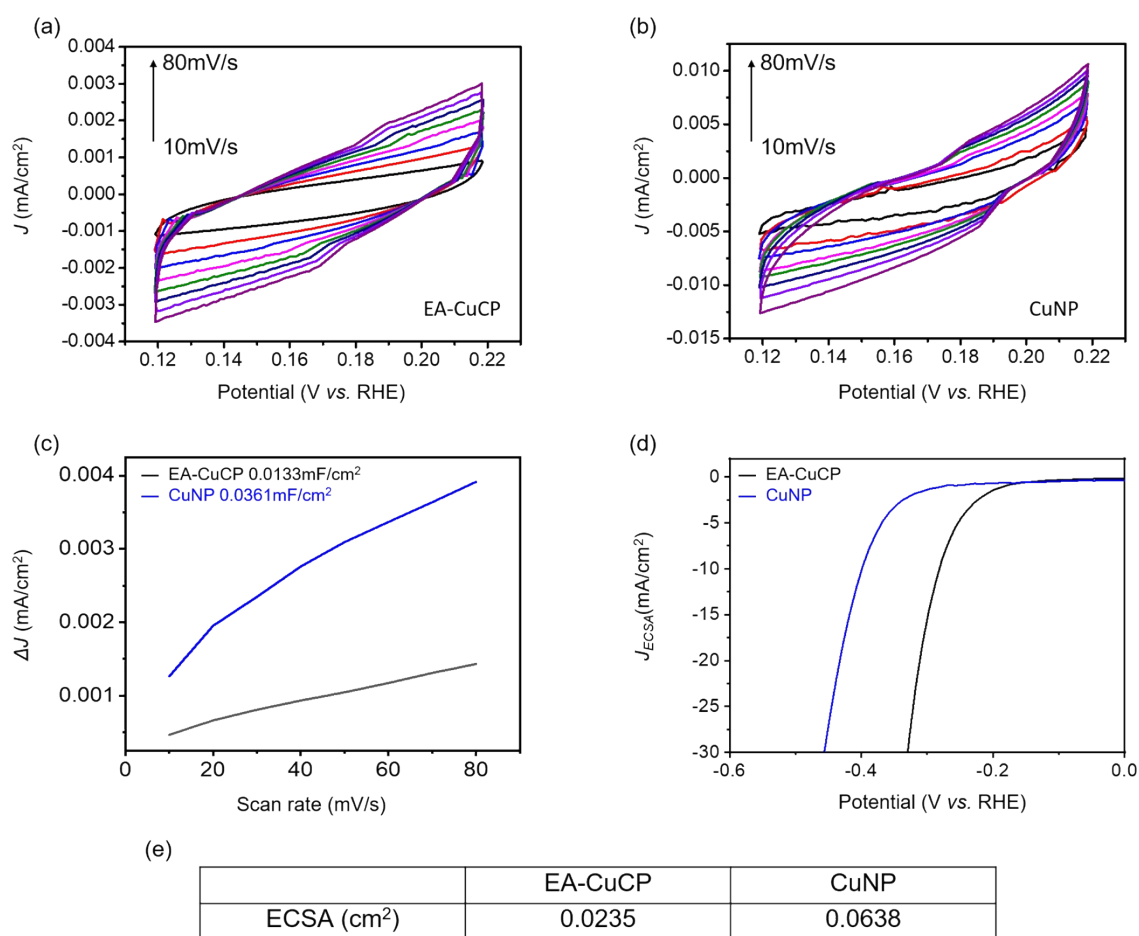

**Fig. S10** Cyclic voltammograms (CV) of Cu catalyst at various scan rates in a 0.5 M H<sub>2</sub>SO<sub>4</sub> solution: (a) EA-CuCP, (b) CuNP, (c) Average current density ( $\Delta j = (j_a - j_c)/2$ ) against the scan rate showing the double-layer capacitance ( $C_{dl}$ ) extracted from the corresponding CVs. (d) LSV based on the ECSA-specific current density in a 0.5 M H<sub>2</sub>SO<sub>4</sub> solution. (e) The ECSA obtained by  $C_{dl}$  measurement was as follows for each catalyst.

The double layer capacitance ( $C_{dl}$ ) was determined from a CV using the equation:  $C_{dl} = \Delta j (j_a - j_c)/2v$ , where  $j_a$  and  $j_c$  are anodic and cathodic current densities at  $\Delta E = 0.1$  V and  $v$  is the scan rate in mV/s. The non-Faradic current density based electrochemically active surface area (ECSA) was estimated according to the equation:  $ECSA = C_{dl}/C_s$ , (where  $C_s$  denoted specific capacitance and was 20-60  $\mu F\ cm^{-2}$  in 0.5 M H<sub>2</sub>SO<sub>4</sub>). In this study the value is selected as 40  $\mu F\ cm^{-2}$ .<sup>1</sup> For the measurement, an electrode with a circle-shaped glassy carbon of 0.3 cm in diameter was used at the end of the rod.

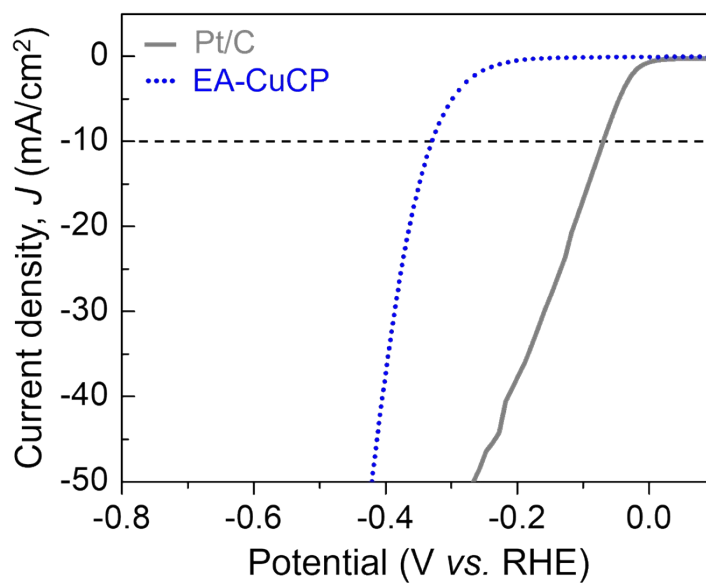

**Fig. S11** HER polarization curves of Pt/C and EA-CuCP.

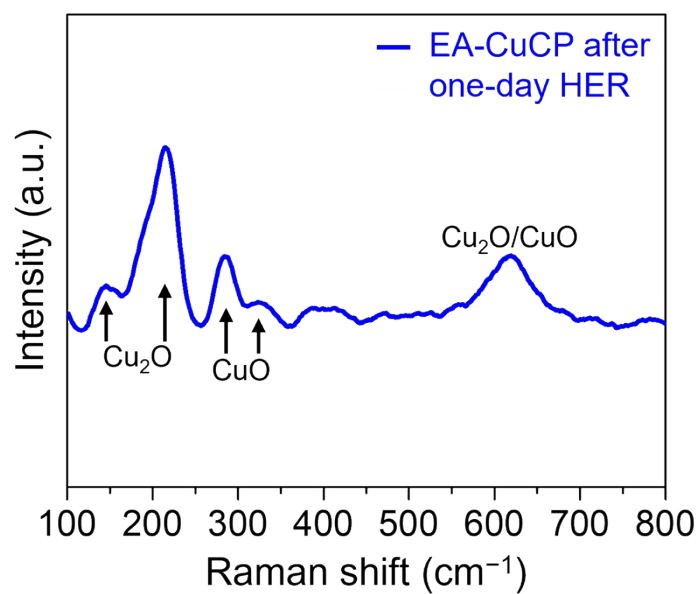

**Fig. S12** Raman spectrum of EA-CuCP after the one-day HER stability test.



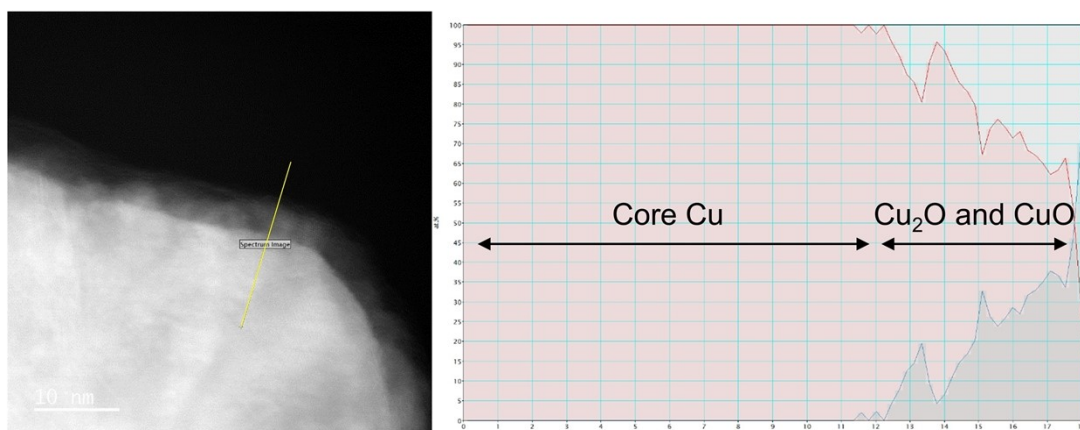

**Fig. S13** EDS line profile measured across the boundary of core Cu and surface oxides (Cu<sub>2</sub>O and CuO).

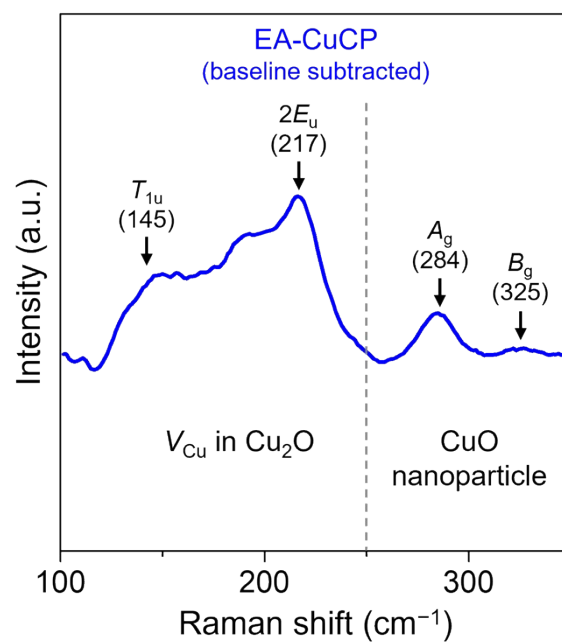

**Fig. S14** Magnified and baseline-subtracted Raman spectrum of EA-CuCP.

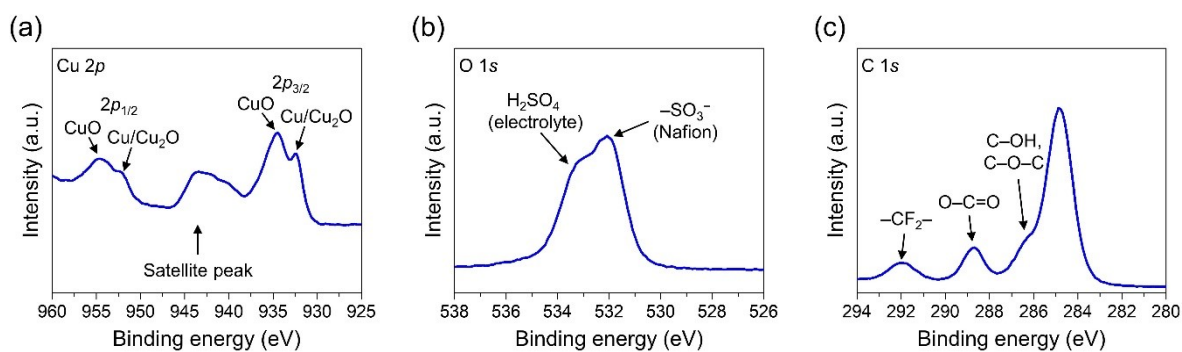

**Fig. S15** XPS spectra of EA-CuCP measured at the core level region of (a) Cu 2p, (b) O 1s, and (c) C 1s.

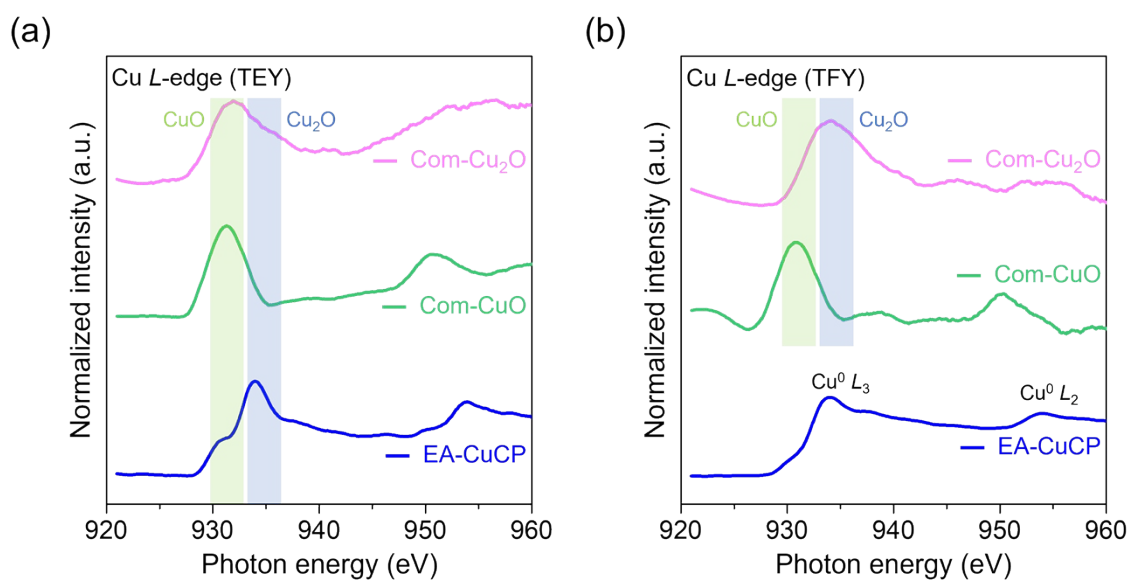

**Fig. S16** Cu L-edge NEXAFS spectra of Com-Cu<sub>2</sub>O, Com-CuO and EA-CuCP recorded by (a) TEY and (b) TFY detection modes.

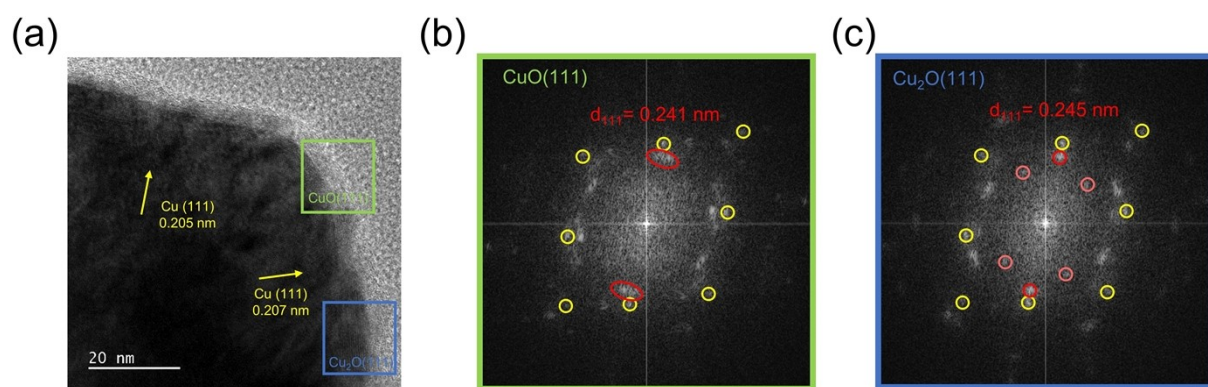

**Fig. S17** (a) HR-TEM image of EA-CuCP. FFT patterns obtained at (b) CuO-rich region and (c) Cu<sub>2</sub>O-rich region.

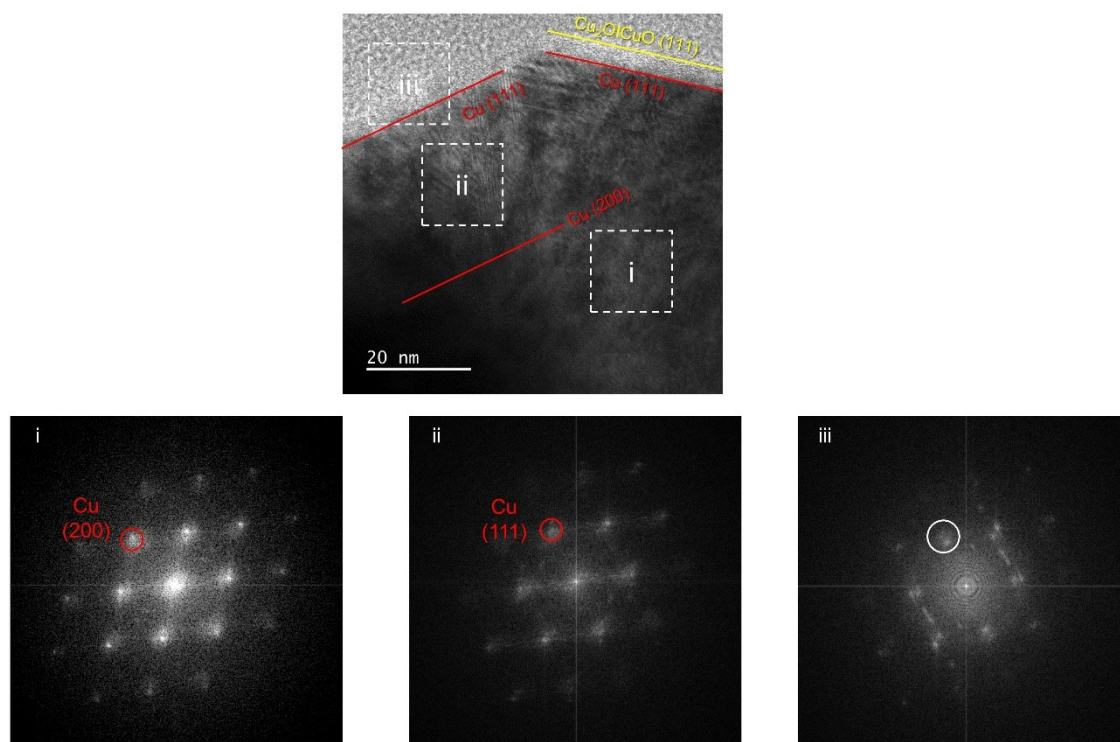

**Fig. S18** HR-TEM image and FFT patterns of EA-CuCP measured at three different regions.

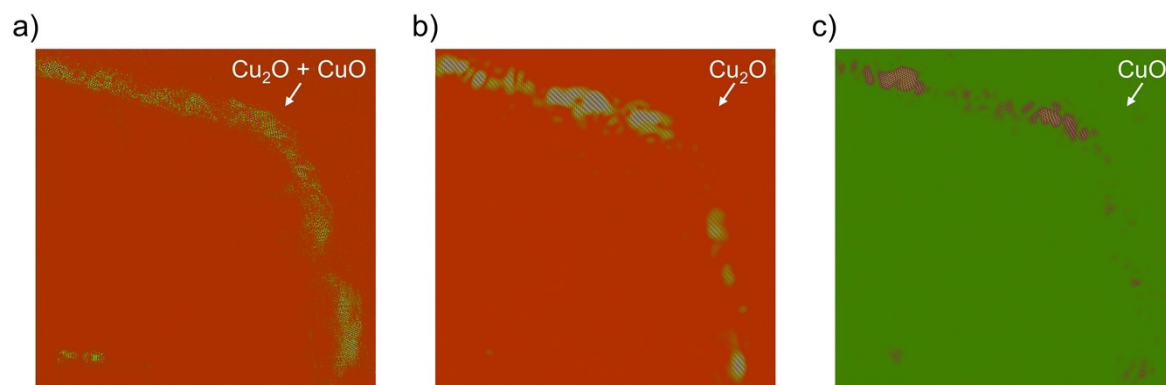

**Fig. S19** Inverse FFT patterns of EA-CuCP with lattice fringes of (a) both  $\text{Cu}_2\text{O}$  and  $\text{CuO}$ , (b)  $\text{Cu}_2\text{O}$ , and (c)  $\text{CuO}$  highlighted.

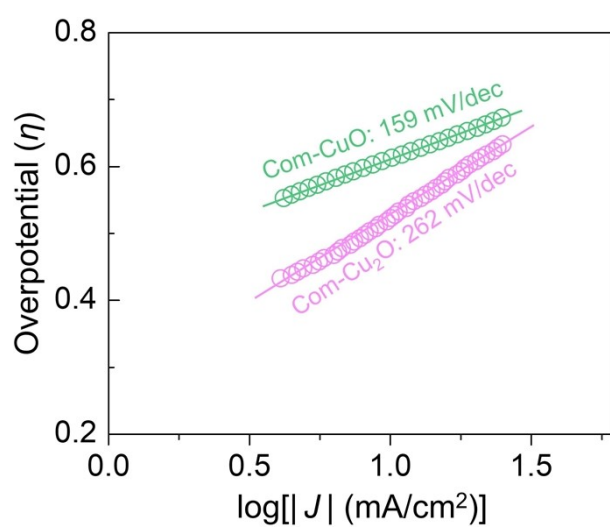

**Fig. S20** Tafel slopes of commercial copper oxides including Com-Cu<sub>2</sub>O and Com-CuO.

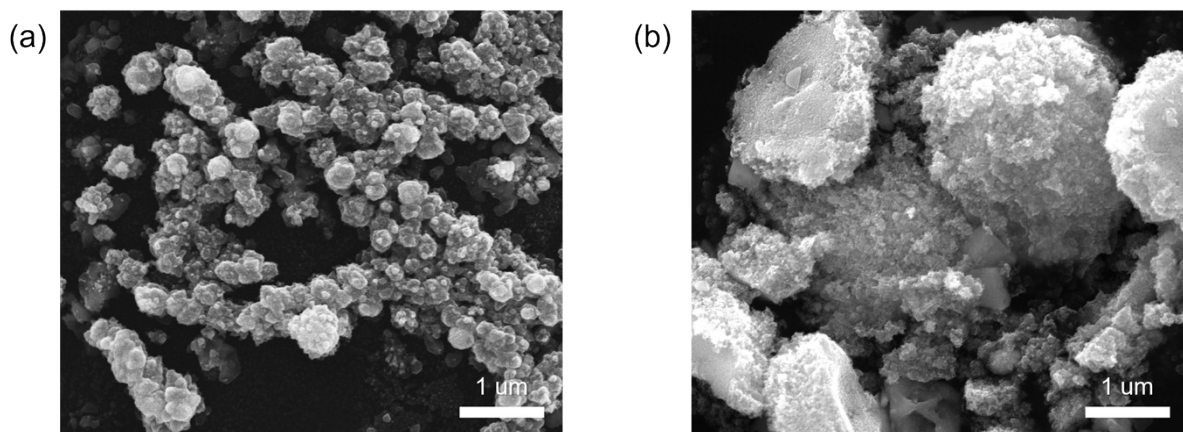

**Figure S21.** SEM images of EA-CuCP (a) before and (b) after (under  $-20 \text{ mA/cm}^2$ , 2800 h) the stability test.

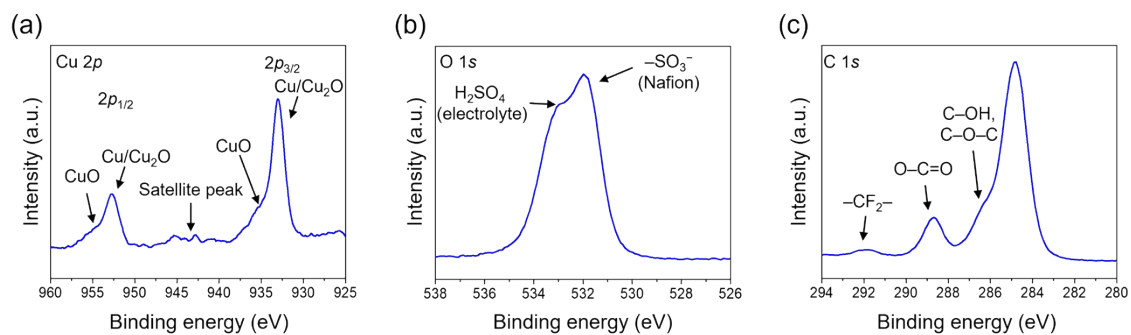

**Figure S22.** XPS spectra of EA-CuCP after stability test (under  $-20 \text{ mA/cm}^2$ , 2800 h). (a) Cu 2p, (b) O 1s, and (c) C 1s.

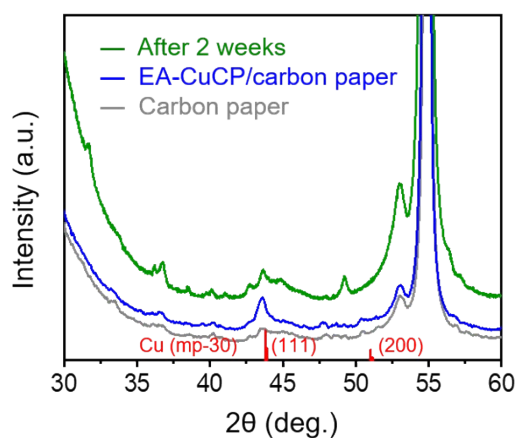

**Figure S23.** XRD pattern of EA-CuCP after stability test (under  $-20 \text{ mA/cm}^2$ , 2 weeks).

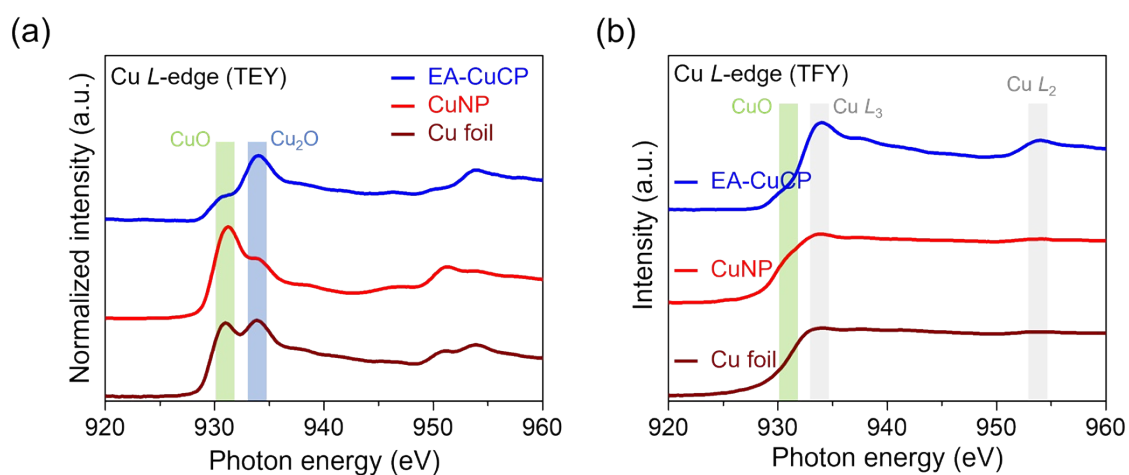

**Fig. S24** Cu L-edge NEXAFS spectra of Cu foil, CuNP, and EA-CuCP recorded using the TFY detection mode.

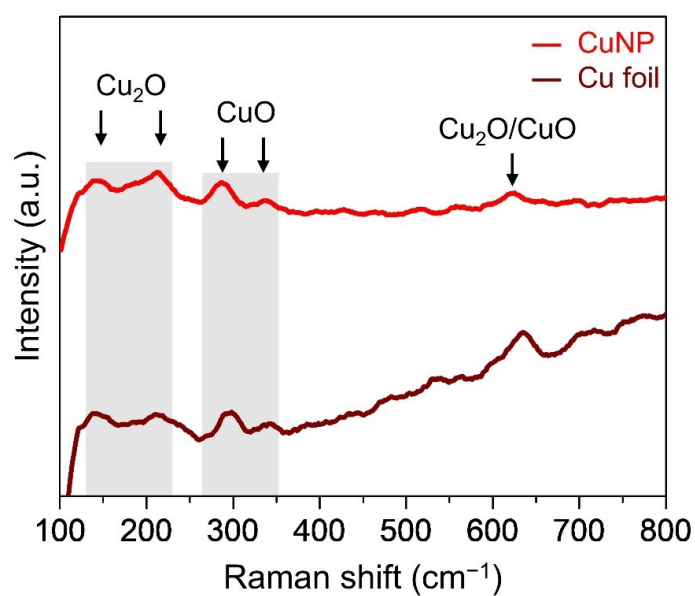

**Fig. S25** Raman spectra of Cu foil and CuNP.



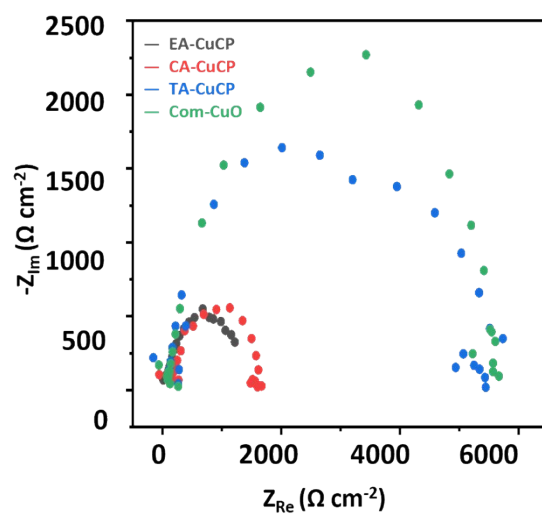

**Fig. S26** Electrochemical impedance spectroscopy analysis of copper-based materials.

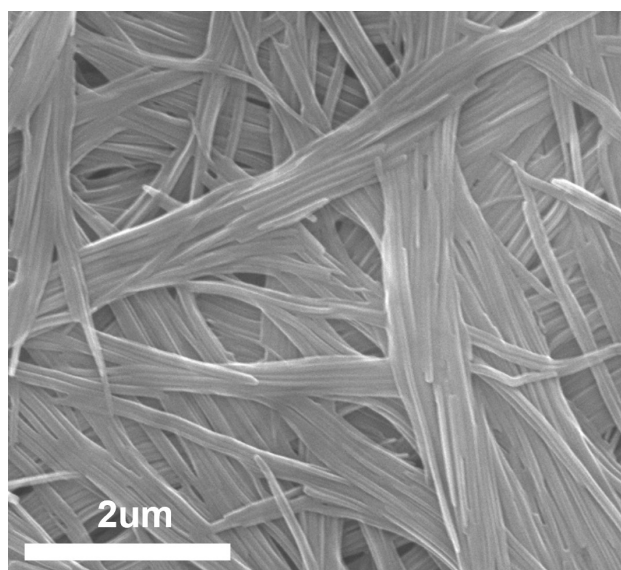

**Fig. S27** SEM image of a TT-CP-mod (Cu:S=1:1)

## Supplementary Tables

| Sample | Space group | Lattice parameters             | $R_{\text{exp}}$ (%) | $R_{\text{wp}}$ (%) | $R_p$ (%) | Goodness of fitting |
|--------|-------------|--------------------------------|----------------------|---------------------|-----------|---------------------|
| TT-CP  | R-3         | a (Å) 19.7045<br>c (Å) 31.6978 | 6.28                 | 8.66                | 6.73      | 1.38                |

**Table S1** Fitting parameters for the Rietveld refinement of TT-CP.



**Table S2** Elemental composition of as-synthesized TT-CP.

| Element | Composition (at%) |
|---------|-------------------|
| C       | 61.76             |
| Cl      | 4.67              |
| Cu      | 6.02              |
| N       | 17.56             |
| O       | 1.61              |
| S       | 8.38              |

**Table S3** HER performance of previously reported copper-based catalysts.

|                                      | HER overpotential              | Stability                                    | Electrolyte                          | Reference |
|--------------------------------------|--------------------------------|----------------------------------------------|--------------------------------------|-----------|
| Cu-Cu <sub>2</sub> ONP@C             | 672 mV@-10 mA cm <sup>-2</sup> | -                                            | 0.4 M H <sub>2</sub> SO <sub>4</sub> | [1]       |
| Pure Cu <sub>2</sub> O               | 549 mV@-10 mA cm <sup>-2</sup> | -                                            | 0.5 M H <sub>2</sub> SO <sub>4</sub> | [2]       |
| Cu <sub>2</sub> O@rGO                | 458 mV@-10 mA cm <sup>-2</sup> | -                                            | 0.5 M H <sub>2</sub> SO <sub>4</sub> | [2]       |
| Cu-Cu <sub>2</sub> O@C2              | 637 mV@-10 mA cm <sup>-2</sup> | -                                            | 0.4 M H <sub>2</sub> SO <sub>4</sub> | [3]       |
| Cu <sub>2</sub> O-200/GCE            | 184 mV@-10 mA cm <sup>-2</sup> | 1000 cycles/<br>20 h @ -0.57 V               | 1.0 M KOH                            | [4]       |
| Cu mesh                              | 622 mV@-10 mA cm <sup>-2</sup> | -                                            | 0.5 M H <sub>2</sub> SO <sub>4</sub> | [5]       |
| Cu <sub>x</sub> O@Cu M400            | 460 mV@-10 mA cm <sup>-2</sup> | -                                            | 0.5 M H <sub>2</sub> SO <sub>4</sub> | [5]       |
| Cu <sub>x</sub> O@Cu M300            | 498 mV@-10 mA cm <sup>-2</sup> | 20 h @<br>-2.5 mA cm <sup>-2</sup>           | 0.5 M H <sub>2</sub> SO <sub>4</sub> | [5]       |
| Plasma spray Cu                      | 182 mV@-10 mA cm <sup>-2</sup> | 30 h @ -0.35 V<br>(100 mA cm <sup>-2</sup> ) | 0.5 M H <sub>2</sub> SO <sub>4</sub> | [6]       |
| Cu/Cu <sub>2</sub> O-<br>CuO/rGO-400 | 105 mV@-10 mA cm <sup>-2</sup> | 15 h @<br>-10 mA cm <sup>-2</sup>            | 1.0 M KOH                            | [7]       |
| EA-CuCP                              | 331 mV@-10 mA cm <sup>-2</sup> | 2,800 hr @<br>-20 mA cm <sup>-2</sup>        | 0.5 M H <sub>2</sub> SO <sub>4</sub> | This work |

## Supplementary References

- [1] P. Muthukumar, V. V. Kumar, G. R. K. Reddy, P. S. Kumar and S. P. Anthony, *Catal. Sci. Technol.*, 2018, **8**, 1414–1422.
- [2] M. A. Ramirez-Ubillus, A. Wang, S. Zou, K. Y. Chumbimuni-Torres and L. Zhai, *J. Compos. Sci.*, 2023, **7**, 403.
- [3] P. Muthukumar, P. S. Kumar and S. P. Anthony, *Mater. Res. Express*, 2018, **6**, 025518.
- [4] M. Wang, X. Cheng and Y. Ni, *Dalton Trans.*, 2019, **48**, 823–832.
- [5] N. Alhebshi, H. Huang, R. Ghandour, N. K. Alghamdi, O. Alharbi, S. Aljurban, J. H. He and H. Al-Jawhari, *J. Alloys Compd.*, 2020, **848**, 156284.
- [6] W.-J. Kang, Y. Feng, Z. Li, W.-Q. Yang, C.-Q. Cheng, Z.-Z. Shi, P.-F. Yin, G.-R. Shen, J. Yang, C.-K. Dong, H. Liu, F.-X. Ye and X.-W. Du, *Adv. Funct. Mater.*, 2022, **32**, 2112367.
- [7] L. Ye and Z. H. Wen, *Chem. Commun.*, 2018, **54**, 6388–6391.
